# Supplementary material for: Phase I/II clinical trial of everolimus combined with gemcitabine/cisplatin for metastatic triple-negative breast cancer
Source: PubMed Central journal article supplement — J Cancer. 2018 Mar 8;9(7):1145–51. doi: 10.7150/jca.24035 (PMC5907662; doi:10.7150/jca.24035), 2018-03-08
Supplement: jcav09p1145s1.pdf [file jcav09p1145s1.pdf]

## Supplementary methods

### *Whole exome sequencing*

For the generation of standard exome capture libraries, the Agilent SureSelect Target Enrichment protocol was used for Illumina paired-end sequencing library (ver. B.3, June 2015) together with 200 ng input FFPE DNA. The quantification and quality of DNA were measured by PicoGreen and Nanodrop. Fragmentation of 1 µg of genomic DNA was performed using adaptive focused acoustic technology (AFA; Covaris, Woburn, MA, USA). The fragmented DNA was repaired, an 'A' was ligated to the 3' end, and Agilent adapters were then ligated to the fragments. Once ligation had been verified, the adapter-ligated product was PCR amplified. The final purified product was then quantified using qPCR according to the qPCR Quantification Protocol Guide and qualified using the TapeStation DNA Screentape (Agilent). For exome capture, 250 ng of DNA library was mixed with hybridization buffers, blocking mixes, RNase block, and 5 µl of SureSelect all exon capture library, according to the standard Agilent SureSelect Target Enrichment protocol. Hybridization to the capture baits was conducted at 65°C using a heated thermal cycler lid option at 105°C for 24 hours on the PCR machine.

The captured DNA was then amplified. The final purified product was quantified using qPCR according to the qPCR Quantification Protocol Guide and qualified using the TapeStation DNA Screentape (Agilent). Finally, the DNA was sequenced using the HiSeq™ 2500 platform (Illumina, San Diego, USA).

Supplementary Table 1. Dose level and schedule in the phase Ib trial.

| Dose level | Gemcitabine mg/m <sup>2</sup><br>(day 1 and 8) | Cisplatin mg/m <sup>2</sup><br>(day 1 and 8) | Everolimus (mg)<br>(daily) |
|------------|------------------------------------------------|----------------------------------------------|----------------------------|
| -1         | 800                                            | 20                                           | 5 mg QOD                   |
| 1          | 800                                            | 30                                           | 5 mg QOD                   |
| 2          | 800                                            | 30                                           | 5 mg daily                 |
| 3          | 800                                            | 30                                           | 10 mg daily                |

Supplemental Table 2. Digital PCR results of *PI3KCA* mutations

| Number | Primary breast cancer |                 |                 | Cell-free DNA     |                   |                   |
|--------|-----------------------|-----------------|-----------------|-------------------|-------------------|-------------------|
|        | E542K                 | E545K           | H1047R          | E542K             | E545K             | H1047R            |
| Ph1-1  | 0.00                  | 0.70 (0.1/12.1) | 0.70 (0.1/11.3) | 0.00              | 0.00              | 0.17 (0.1/75.0)   |
| Ph1-2  | NA                    | NA              | NA              | 0.00              | 0.02 (0.2/725.0)  | 0.16 (1.1/706.0)  |
| Ph1-3  | NA                    | NA              | NA              | 0.00              | 0.00              | 0.03 (0.1/355.0)  |
| Ph1-4  | 0.60 (0.3/45.6)       | 0.18 (0.1/48.1) | 0.30 (0.2/47.9) | 0.00              | 0.11 (0.2/208.0)  | 0.26 (0.5/195.0)  |
| Ph1-5  | 2.80 (0.2/7.2)        | 28.00 (2.2/5.7) | 0.00            | 0.00              | 0.00              | 0.15 (0.2/103.0)  |
| Ph1-6  | NA                    | NA              | NA              | 0.06 (0.1/168.0)  | 0.00              | 0.25 (0.4/157.0)  |
| Ph1-7  | NA                    | NA              | NA              | 0.01 (0.1/1139.0) | 0.02 (0.2/1117.0) | 0.15 (1.7/1129.0) |
| Ph1-8  | 0.00                  | 7.20 (2.2/28.1) | 0.29 (0.1/26.1) | 0.06 (0.1/192.0)  | 0.00              | 0.22 (0.4/173.0)  |
| Ph1-9  | 1.40 (0.2/12.0)       | 0.00            | 0.00            | 0.02 (0.1/371.0)  | 0.07 (0.2/360.0)  | 0.20 (0.7/351.0)  |
| Ph2-1  | 0.00                  | 0.00            | 0.00            | 0.00              | 0.14 (0.2/115.0)  | 0.09 (0.1/112.0)  |
| Ph2-2  | 0.00                  | 5.00 (0.1/1.4)  | 0.00            | 0.07 (0.1/148.0)  | 0.00              | 0.28 (0.4/125.0)  |
| Ph2-3  | NA                    | NA              | NA              | 0.00              | 0.00              | 0.37 (0.1/29.9)   |
| Ph2-4  | 0.00                  | 0.00            | 0.00            | 0.00              | 0.00              | 0.29 (0.2/66.3)   |
| Ph2-5  | 0.00                  | 0.00            | 0.00            | 0.00              | 0.00              | 0.13 (0.3/221.0)  |
| Ph2-6  | 0.00                  | 1.10 (0.1/6.5)  | 0.00            | 0.17 (0.1/52.2)   | 0.00              | 0.38 (0.2/52.5)   |
| Ph2-7  | NA                    | NA              | NA              | 0.00              | 0.00              | 0.08 (0.1/138.0)  |
| Ph2-8  | 0.00                  | 0.60 (0.1/23.8) | 1.10 (0.3/28.8) | 0.38 (0.1/29.2)   | 0.00              | 6.16 (1.7/25.9)   |
| Ph2-9  | 0.00                  | 0.00            | 0.00            | 0.00              | 0.00              | 0.07 (0.1/135.0)  |
| Ph2-10 | 0.00                  | 0.00            | 0.00            | 0.00              | 0.00              | 0.00              |
| Ph2-11 | NA                    | NA              | NA              | 0.00              | 0.00              | 0.00              |
| Ph2-12 | NA                    | NA              | NA              | 0.10 (0.1/103.0)  | 0.08 (0.1/98.0)   | 0.09 (0.1/102.0)  |
| Ph2-13 | NA                    | NA              | NA              | 0.00              | 0.00              | 0.00              |
| Ph2-14 | 0.00                  | 0.00            | 0.00            | 0.02              | 0.00              | 0.19 (0.7/376.0)  |

Fractional abundance (%) (FAM positive / [FAM positive +HEX positive]), 0.1% and more evaluated as mutation positive
